# Supplementary material for: Studying the consumption and health outcomes of fiscal interventions (taxes and subsidies) on food and beverages in countries of different income classifications; a systematic review
Source: Springer Nature journal article supplement (doi:10.1186/s12889-015-2201-8), 2015-09-14
Supplement: MOESM1 [file 9750238]

## Additional file 1. Search strategy

| Database:                                                                                                                                                                    | Interface:                                                                                                      | Dates:                    | Hits:                      |
|------------------------------------------------------------------------------------------------------------------------------------------------------------------------------|-----------------------------------------------------------------------------------------------------------------|---------------------------|----------------------------|
| EconLit                                                                                                                                                                      | Proquest                                                                                                        | 29/07/13                  | LMICs = 810<br>Other = 905 |
| Global Health                                                                                                                                                                | OvidSP (1973-present)                                                                                           | 29/07/13                  | LMICs = 841<br>Other =1224 |
| Global Health Library                                                                                                                                                        | <a href="http://www.globalhealthlibrary.net/php/index.php">http://www.globalhealthlibrary.net/php/index.php</a> | 29/07/13                  | LMICs = 91                 |
| Grey literature web-sites                                                                                                                                                    | Sites listed in appendix                                                                                        | 29/07/13<br>&<br>30/07/13 | All =40                    |
| Medline                                                                                                                                                                      | OvidSP (1946 – present)                                                                                         | 29/07/13                  | LMICs = 541<br>Other =1760 |
| PAIS International                                                                                                                                                           | Proquest                                                                                                        | 29/07/13                  | LMICs = 370<br>Other = 574 |
| Dissertations & Theses                                                                                                                                                       | Proquest                                                                                                        | 29/07/13                  | LMICs = 113<br>Other = 292 |
| Science Citation Index, Social Science Citation Index, Conference Proceedings Citation Index – Science & Conference Proceedings Citation Index – Social Science & Humanities | Web of Science (1945 – present)                                                                                 | 29/07/13                  | LMICs = 419<br>Other =1156 |
| Total:                                                                                                                                                                       |                                                                                                                 |                           | 9136                       |
| Duplicates:                                                                                                                                                                  |                                                                                                                 |                           | 2230                       |
| Animal studies removed:                                                                                                                                                      |                                                                                                                 |                           | 91                         |
| Final total:                                                                                                                                                                 |                                                                                                                 |                           | LMIC =1858<br>Other =4948  |

### Limits applied:

English language

### Additional search methods:

33 Systematic reviews were identified through a search of Medline (OvidSP), Cochrane Library and DARE.

## Search strategy:

### Global Health (OvidSP) [1973 – present]

- 1 (food\* and (tax or taxes or taxing or taxation)).ti.
- 2 ((beverage? or soda? or soft drink? or carbonated drink? or sugar sweetened drink?) and (tax or taxes or taxing or taxation)).ti.
- 3 ((sugar\* or fat or fats or sucrose or candy or sweet\* or snack\* or fastfood? or junkfood?) and (tax or taxes or taxing or taxation)).ti.
- 4 ((diet\* or nutrition\* or obesity or obese or overweight) and (tax or taxes or taxing or taxation)).ti.
- 5 ((vegetable? or fruit?) and (tax or taxes or taxing or taxation)).ti.
- 6 ((vending machine? or takeaway?) and (tax or taxes or taxing or taxation)).ti.
- 7 (food\* and (price? or pricing)).ti.
- 8 ((beverage? or soda? or soft drink? or carbonated drink? or sugar sweetened drink?) and (price? or pricing)).ti.
- 9 ((sugar\* or fat or fats or sucrose or candy or sweet\* or snack\* or fastfood? or junkfood?) and (price? or pricing)).ti.
- 10 ((vegetable? or fruit?) and (price? or pricing)).ti.
- 11 (food\* and (subsidy or subsidies or incentiv\* or voucher?)).ti.
- 12 ((beverage? or soda? or soft drink? or carbonated drink? or sugar sweetened drink?) and (subsidy or subsidies or incentiv\* or voucher?)).ti.
- 13 ((sugar\* or fat or fats or sucrose or candy or sweet\* or snack\* or fastfood? or junkfood?) and (subsidy or subsidies or incentiv\* or voucher?)).ti.
- 14 ((vegetable? or fruit?) and (subsidy or subsidies or incentiv\* or voucher?)).ti.
- 15 (food\* adj5 (tax or taxes or taxing or taxation)).ti,ab.
- 16 ((beverage? or soda? or soft drink? or carbonated drink? or sugar sweetened drink?) adj5 (tax or taxes or taxing or taxation)).ti,ab.
- 17 ((sugar\* or fat or fats or sucrose or candy or sweet\* or snack\* or fastfood? or junkfood?) adj5 (tax or taxes or taxing or taxation)).ti,ab.
- 18 ((vegetable? or fruit?) adj5 (tax or taxes or taxing or taxation)).ti,ab.
- 19 ((diet\* or nutrition\* or obesity or obese or overweight) adj5 (tax or taxes or taxing or taxation)).ti,ab.
- 20 ((vending machine? or takeaway?) adj5 (tax or taxes or taxing or taxation)).ti,ab.
- 21 (food\* adj5 (price? or pricing)).ti,ab.
- 22 ((beverage? or soda? or soft drink? or carbonated drink? or sugar sweetened drink?) adj5 (price? or pricing)).ti,ab.
- 23 ((sugar\* or fat or fats or sucrose or candy or sweet\* or snack\* or fastfood? or junkfood?) adj5 (price? or pricing)).ti,ab.
- 24 ((vegetable? or fruit?) adj5 (price? or pricing)).ti,ab.
- 25 (food\* adj5 (subsidy or subsidies or incentiv\* or voucher?)).ti,ab.
- 26 ((beverage? or soda? or soft drink? or carbonated drink? or sugar sweetened drink?) adj5 (subsidy or subsidies or incentiv\* or voucher?)).ti,ab.

- 27 ((sugar\* or fat or fats or sucrose or candy or sweet\* or snack\* or fastfood? or junkfood?) adj5 (subsidy or subsidies or incentiv\* or voucher?)).ti,ab.
- 28 ((vegetable? or fruit?) adj5 (subsidy or subsidies or incentiv\* or voucher?)).ti,ab.
- 29 or/1-28
- foods/ or confectionery/ or convenience foods/ or desserts/ or fast foods/ or fried foods/ or health
- 30 foods/ or food products/ or fruit products/ or sugar/ or vegetable products/ or exp vegetables/ or exp fruits/
- 31 feeding habits/ or feeding preferences/
- 32 beverages/ or fruit drinks/ or soft drinks/
- 33 food consumption/
- 34 food intake/
- 35 Food policy/ or Nutrition Policy/
- 36 (food\* or beverage? or soda? or soft drink? or carbonated drink? or sugar sweetened drink? or sugar\* or fat or fats or sucrose or candy or sweet\* or snack\* or fastfood\* or vending machine\*).ti.
- 37 (obese or obesity or overweight or diet\* or nutrition\*).ti.
- 38 or/30-37
- 39 taxes/ or direct taxation/ or indirect taxation/ or tax credits/ or tax incentives/
- 40 economic policy/ or fiscal policy/ or price policy/
- 41 food prices/ or prices/
- 42 subsidies/
- 43 (tax or taxes or taxing or taxation).ti.
- 44 ((price? or pricing or demand\* or fiscal\* or economic\* or financ\* or cost?) adj3 (elasticity or elasticities)).ti,ab.
- 45 ((price? or pricing or demand\* or fiscal\* or economic\* or financ\* or cost?) adj3 (policy or policies)).ti,ab.
- 46 ((price? or pricing or demand\* or fiscal\* or economic\* or financ\* or cost?) adj3 (priority or priorities)).ti,ab.
- 47 ((price? or pricing or demand\* or fiscal\* or economic\* or financ\* or cost?) adj3 (subsidy or subsidies or incentiv\* or voucher? or reward?)).ti,ab.
- 48 or/39-47
- 49 38 and 48
- 50 ((food\* or nutrition\* or diet\* or obes\* or overweight) adj3 (policy or policies)).ti,ab.
- 51 (tax or taxes or taxing or taxation or price? or pricing or fiscal\* or economic\* or financ\* or cost\* or subsidy or subsidies or incentiv\* or voucher?).ti,ab,hw.
- 52 50 and 51
- 53 29 or 49 or 52
- 54 (body mass or body fat\* or bmi or obes\* or overweight or body weight).af.
- 55 ((healthy or healthier or healthful or healthily) adj3 (food\* or eating or choice\* or lifestyle or lifestyle)).af.
- 56 (fruit\* or vegetable\*).af.
- 57 ((food\* or energy or beverage\* or drink\*) adj2 (consumption or consume\* or intake)).af.
- 58 (public health or healthy living or health promotion).af.
- 59 or/54-58

60 53 and 59

61 limit 60 to english language

62 exp developing countries/ or exp africa/

63 (Africa or Asia or Caribbean or West Indies or South America or Latin America or Central America).hw,ti,ab,cp.

64 ((developing or less\* developed or under developed or underdeveloped or middle income or low\* income or underserved or under served or deprived or poor\*) adj (countr\* or nation? or population? or world)).ti,ab.

(Afghanistan or Albania or Algeria or Angola or Antigua or Barbuda or Argentina or Armenia or Armenian or Aruba or Azerbaijan or Bahrain or Bangladesh or Barbados or Benin or Byelarus or Byelorussian or Belarus or Belorussian or Belorussia or Belize or Bhutan or Bolivia or Bosnia or Herzegovina or Hercegovina or Botswana or Brazil or Brasil or Bulgaria or Burkina Faso or Burkina Fasso or Upper Volta or Burundi or Urundi or Cambodia or Khmer Republic or Kampuchea or Cameroon or Cameroons or Cameron or Camerons or Cape Verde or Central African Republic or Chad or Chile or China or Colombia or Comoros or Comoro Islands or Comores or Mayotte or Congo or Zaire or Costa Rica or Cote d'Ivoire or Ivory Coast or Croatia or Cuba or Cyprus or Czechoslovakia or Czech Republic or Slovakia or Slovak Republic or Djibouti or French Somaliland or Dominica or Dominican Republic or East Timor or East Timur or Timor Leste or Ecuador or Egypt or United Arab Republic or El Salvador or Eritrea or Estonia or Ethiopia or Fiji or Gabon or Gabonese Republic or Gambia or Gaza or Georgia Republic or Georgian Republic or Ghana or Gold Coast or Greece or Grenada or Guatemala or Guinea or Guam or Guiana or Guyana or Haiti or Honduras or Hungary or India or Maldives or Indonesia or Iran or Iraq or Isle of Man or Jamaica or Jordan or Kazakhstan or Kazakh or Kenya or Kiribati or Korea or Kosovo or Kyrgyzstan or Kirghizia or Kyrgyz Republic or Kirghiz or Kirgizstan or Lao PDR or Laos or Latvia or Lebanon or Lesotho or Basutoland or Liberia or Libya or Lithuania or Macedonia or Madagascar or Malagasy Republic or Malaysia or Malaya or Malay or Sabah or Sarawak or Malawi or Nyasaland or Mali or Malta or Marshall Islands or Mauritania or Mauritius or Agalega Islands or Mexico or Micronesia or Middle East or Moldova or Moldovia or Moldovian or Mongolia or Montenegro or Morocco or Ifni or Mozambique or Myanmar or Myanma or Burma or Namibia or Nepal or Netherlands Antilles or New Caledonia or Nicaragua or Niger or Nigeria or Northern Mariana Islands or Oman or Muscat or Pakistan or Palau or Palestine or Panama or Paraguay or Peru or Philippines or Philipines or Phillipines or Phillippines or Poland or Portugal or Puerto Rico or Romania or Rumania or Roumania or Russia or Russian or Rwanda or Ruanda or Saint Kitts or St Kitts or Nevis or Saint Lucia or St Lucia or Saint Vincent or St Vincent or Grenadines or Samoa or Samoan Islands or Navigator Island or Navigator Islands or Sao Tome or Saudi Arabia or Senegal or Serbia or Montenegro or Seychelles or Sierra Leone or Slovenia or Sri Lanka or Ceylon or Solomon Islands or Somalia or Sudan or Suriname or Surinam or Swaziland or Syria or Tajikistan or Tadjikistan or Tadjik or Tanzania or Thailand or Togo or Togolese Republic or Tonga or Trinidad or Tobago or Tunisia or Turkey or Turkmenistan or Turkmen or Uganda or Ukraine or Uruguay or USSR or Soviet Union or Union of Soviet Socialist Republics or Uzbekistan or Uzbek or Vanuatu or New Hebrides or Venezuela or Vietnam or Viet Nam or West Bank or Yemen or Yugoslavia or Zambia or Zimbabwe or Rhodesia).hw,ti,ab,cp.

66 ((developing or less\* developed or under developed or underdeveloped or middle income or low\* income) adj (economy or economies)).ti,ab.

67 (low\* adj (gdp or gnp or gross domestic or gross national)).ti,ab.

68 (low adj3 middle adj3 countr\*).ti,ab.

69 (lmic or lmic3 or third world or lami countr\*).ti,ab.

70 transitional countr\*.ti,ab.

71 62 or 63 or 64 or 65 or 66 or 67 or 68 or 69 or 70

72 61 and 71

73 61 not 72

74 60 not 61

---

**Global Health Library:** <http://pesquisa.bvsalud.org/ghl/index.php>

(food\* OR beverage\* OR soda OR sodas OR soft drink\* OR carbonated drink\* OR sugar\* OR fat OR fats OR sucrose OR candy OR sweet\* OR snack\* OR fastfood\* OR junkfood\* OR vending machine\*) AND (tax OR taxes OR taxation OR taxing OR subsidy OR subsidies OR incentiv\* OR voucher\*) – in Regional Indexes

(obese OR obesity OR overweight OR fat OR "healthy eating" OR "healthy lifestyle") AND (tax OR taxes OR taxation OR taxing OR subsidy OR subsidies OR incentiv\* OR voucher\*) – in Regional Indexes

(food\* OR beverage\* OR soda OR sodas OR soft drink\* OR carbonated drink\* OR sugar\* OR fat OR fats OR sucrose OR candy OR sweet\* OR snack\* OR fastfood\* OR junkfood\* OR vending machine\*) AND ("price elasticity" OR "price elasticities" OR "deman elasticity" OR "demand elasticities" OR "financial elasticity" OR "financial elasticities" OR "pricing elasticity" OR "pricing elasticities" OR "economic elasticity" OR "economic elasticities" OR "cost elasticity" OR "cost elasticities" OR "fiscal elasticity" OR "fiscal elasticities") – in Regional Indexes

**Medline (OvidSP) [1946-present]**

- 1 (food\* and (tax or taxes or taxing or taxation)).ti.
- 2 ((beverage? or soda? or soft drink? or carbonated drink? or sugar sweetened drink?) and (tax or taxes or taxing or taxation)).ti.
- 3 ((sugar\* or fat or fats or sucrose or candy or sweet\* or snack\* or fastfood? or junkfood?) and (tax or taxes or taxing or taxation)).ti.
- 4 ((diet\* or nutrition\* or obesity or obese or overweight) and (tax or taxes or taxing or taxation)).ti.
- 5 ((vegetable? or fruit?) and (tax or taxes or taxing or taxation)).ti.
- 6 ((vending machine? or takeaway?) and (tax or taxes or taxing or taxation)).ti.
- 7 (food\* and (price? or pricing)).ti.
- 8 ((beverage? or soda? or soft drink? or carbonated drink? or sugar sweetened drink?) and (price? or pricing)).ti.
- 9 ((sugar\* or fat or fats or sucrose or candy or sweet\* or snack\* or fastfood? or junkfood?) and (price? or pricing)).ti.
- 10 ((vegetable? or fruit?) and (price? or pricing)).ti.
- 11 (food\* and (subsidy or subsidies or incentiv\* or voucher?)).ti.
- 12 ((beverage? or soda? or soft drink? or carbonated drink? or sugar sweetened drink?) and (subsidy or subsidies or incentiv\* or voucher?)).ti.
- 13 ((sugar\* or fat or fats or sucrose or candy or sweet\* or snack\* or fastfood? or junkfood?) and (subsidy or subsidies or incentiv\* or voucher?)).ti.
- 14 ((vegetable? or fruit?) and (subsidy or subsidies or incentiv\* or voucher?)).ti.
- 15 (food\* adj5 (tax or taxes or taxing or taxation)).ti,ab.
- 16 ((beverage? or soda? or soft drink? or carbonated drink? or sugar sweetened drink?) adj5 (tax or taxes or taxing or taxation)).ti,ab.
- 17 ((sugar\* or fat or fats or sucrose or candy or sweet\* or snack\* or fastfood? or junkfood?) adj5 (tax or taxes or taxing or taxation)).ti,ab.
- 18 ((vegetable? or fruit?) adj5 (tax or taxes or taxing or taxation)).ti,ab.
- 19 ((diet\* or nutrition\* or obesity or obese or overweight) adj5 (tax or taxes or taxing or taxation)).ti,ab.
- 20 ((vending machine? or takeaway?) adj5 (tax or taxes or taxing or taxation)).ti,ab.
- 21 (food\* adj5 (price? or pricing)).ti,ab.
- 22 ((beverage? or soda? or soft drink? or carbonated drink? or sugar sweetened drink?) adj5 (price? or pricing)).ti,ab.
- 23 ((sugar\* or fat or fats or sucrose or candy or sweet\* or snack\* or fastfood? or junkfood?) adj5 (price? or pricing)).ti,ab.
- 24 ((vegetable? or fruit?) adj5 (price? or pricing)).ti,ab.
- 25 (food\* adj5 (subsidy or subsidies or incentiv\* or voucher?)).ti,ab.
- 26 ((beverage? or soda? or soft drink? or carbonated drink? or sugar sweetened drink?) adj5 (subsidy or subsidies or incentiv\* or voucher?)).ti,ab.
- 27 ((sugar\* or fat or fats or sucrose or candy or sweet\* or snack\* or fastfood? or junkfood?) adj5 (subsidy or subsidies or incentiv\* or voucher?)).ti,ab.

- 28 ((vegetable? or fruit?) adj5 (subsidy or subsidies or incentiv\* or voucher?)).ti,ab.  
29 or/1-28  
30 exp Food/  
31 food habits/ or food preferences/  
32 beverages/ or carbonated beverages/  
33 Energy Intake/  
34 Food Dispensers, Automatic/  
35 Obesity/pc [Prevention & Control]  
36 (food\* or beverage? or soda? or soft drink? or carbonated drink? or sugar sweetened drink? or sugar\* or fat or fats or sucrose or candy or sweet\* or snack\* or fastfood\* or vending machine\*).ti.  
37 (obese or obesity or overweight or diet\* or nutrition\*).ti.  
38 or/30-37  
39 exp Taxes/  
40 Health Policy/ec [Economics]  
41 Nutrition Policy/ec [Economics]  
42 (tax or taxes or taxing or taxation).ti.  
43 ((price? or pricing or demand\* or fiscal\* or economic\* or financ\* or cost?) adj3 (elasticity or elasticities)).ti,ab.  
44 ((price? or pricing or demand\* or fiscal\* or economic\* or financ\* or cost?) adj3 (policy or policies)).ti,ab.  
45 ((price? or pricing or demand\* or fiscal\* or economic\* or financ\* or cost?) adj3 (priority or priorities)).ti,ab.  
46 ((price? or pricing or demand\* or fiscal\* or economic\* or financ\* or cost?) adj3 (subsidy or subsidies or incentiv\* or voucher? or reward?)).ti,ab.  
47 or/39-46  
48 38 and 47  
49 ((food\* or nutrition\* or diet\* or obes\* or overweight) adj3 (policy or policies)).ti,ab.  
50 (tax or taxes or taxing or taxation or price? or pricing or fiscal\* or economic\* or financ\* or cost\* or subsidy or subsidies or incentiv\* or voucher?).ti,ab,hw.  
51 49 and 50  
52 29 or 48 or 51  
53 limit 52 to english language  
54 limit 53 to "reviews (maximizes specificity)"  
55 Developing Countries/  
56 (Africa or Caribbean or West Indies or South America or Latin America or Central America).hw,kf,ti,ab,cp.  
57 (Afghanistan or Albania or Algeria or Angola or Antigua or Barbuda or Argentina or Armenia or Armenian or Aruba or Azerbaijan or Bahrain or Bangladesh or Barbados or Benin or Byelarus or Byelorussian or Belarus or Belorussian or Belorussia or Belize or Bhutan or Bolivia or Bosnia or Herzegovina or Hercegovina or Botswana or Brazil or Brasil or Bulgaria or Burkina Faso or Burkina Fasso or Upper Volta or Burundi or Urundi or Cambodia or Khmer Republic or Kampuchea or Cameroon or Cameroons or Cameron or Camerons or Cape Verde or Central African Republic or Chad or Chile or China or Colombia or Comoros or Comoro Islands or Comores or Mayotte or Congo or Zaire or Costa Rica or Cote d'Ivoire or Ivory Coast or Croatia or Cuba or Cyprus or Czechoslovakia



or Czech Republic or Slovakia or Slovak Republic or Djibouti or French Somaliland or Dominica or Dominican Republic or East Timor or East Timur or Timor Leste or Ecuador or Egypt or United Arab Republic or El Salvador or Eritrea or Estonia or Ethiopia or Fiji or Gabon or Gabonese Republic or Gambia or Gaza or Georgia Republic or Georgian Republic or Ghana or Gold Coast or Greece or Grenada or Guatemala or Guinea or Guam or Guiana or Guyana or Haiti or Honduras or Hungary or India or Maldives or Indonesia or Iran or Iraq or Isle of Man or Jamaica or Jordan or Kazakhstan or Kazakh or Kenya or Kiribati or Korea or Kosovo or Kyrgyzstan or Kirghizia or Kyrgyz Republic or Kirghiz or Kirgizstan or Lao PDR or Laos or Latvia or Lebanon or Lesotho or Basutoland or Liberia or Libya or Lithuania or Macedonia or Madagascar or Malagasy Republic or Malaysia or Malaya or Malay or Sabah or Sarawak or Malawi or Nyasaland or Mali or Malta or Marshall Islands or Mauritania or Mauritius or Agalega Islands or Mexico or Micronesia or Middle East or Moldova or Moldovia or Moldovian or Mongolia or Montenegro or Morocco or Ifni or Mozambique or Myanmar or Myanma or Burma or Namibia or Nepal or Netherlands Antilles or New Caledonia or Nicaragua or Niger or Nigeria or Northern Mariana Islands or Oman or Muscat or Pakistan or Palau or Palestine or Panama or Paraguay or Peru or Philippines or Philipines or Phillipines or Phillippines or Poland or Portugal or Puerto Rico or Romania or Rumania or Roumania or Russia or Russian or Rwanda or Ruanda or Saint Kitts or St Kitts or Nevis or Saint Lucia or St Lucia or Saint Vincent or St Vincent or Grenadines or Samoa or Samoan Islands or Navigator Island or Navigator Islands or Sao Tome or Saudi Arabia or Senegal or Serbia or Montenegro or Seychelles or Sierra Leone or Slovenia or Sri Lanka or Ceylon or Solomon Islands or Somalia or Sudan or Suriname or Surinam or Swaziland or Syria or Tajikistan or Tadjikistan or Tadjikistan or Tadjhik or Tanzania or Thailand or Togo or Togolese Republic or Tonga or Trinidad or Tobago or Tunisia or Turkey or Turkmenistan or Turkmen or Uganda or Ukraine or Uruguay or USSR or Soviet Union or Union of Soviet Socialist Republics or Uzbekistan or Uzbek or Vanuatu or New Hebrides or Venezuela or Vietnam or Viet Nam or West Bank or Yemen or Yugoslavia or Zambia or Zimbabwe or Rhodesia).hw,kf,ti,ab,cp.

58 ((developing or less\* developed or under developed or underdeveloped or middle income or low\* income or underserved or under served or deprived or poor\*) adj (countr\* or nation? or population? or world)).ti,ab.

59 ((developing or less\* developed or under developed or underdeveloped or middle income or low\* income) adj (economy or economies)).ti,ab.

60 (low\* adj (gdp or gnp or gross domestic or gross national)).ti,ab.

61 (low adj3 middle adj3 countr\*).ti,ab.

62 (lmic or Imics or third world or lami countr\*).ti,ab.

63 transitional countr\*.ti,ab.

64 55 or 56 or 57 or 58 or 59 or 60 or 61 or 62 or 63

65 53 and 64

66 53 not 65

67 52 not 53

---

| Set# | Searched for                                                                                                                                                                                |
|------|---------------------------------------------------------------------------------------------------------------------------------------------------------------------------------------------|
| S1   | ti(obes* OR overweight OR fat) AND ti(tax*)                                                                                                                                                 |
| S2   | AB(food* or beverage* or soda or sodas or soft drink* or carbonated drink* or sugar* or fat or fats or sucrose or candy or sweet* or snack* or fastfood* or junkfood* or vending machine* ) |
| S3   | AB(tax or taxes or taxation or taxing or price or prices or pricing or subsidy or subsidies or incentiv* or voucher* or reward*)                                                            |
| S4   | AB(elastic* NEAR/3 (price* or pricing or demand* or fiscal* or economic* or financ* or cost*))                                                                                              |
| S5   | AB(policy NEAR/3 (price* or pricing or demand* or fiscal* or economic* or financ* or cost*))                                                                                                |
| S6   | AB(policies NEAR/3 (price* or pricing or demand* or fiscal* or economic* or financ* or cost*))                                                                                              |
| S7   | S3 OR S4 OR S5 OR S6                                                                                                                                                                        |
| S8   | body mass or body fat* or bmi or obes* or overweight or body weight                                                                                                                         |
| S10  | (health* NEAR/3 (food* or eating or choice* or lifestyle or lifestyle))                                                                                                                     |
| S11  | fruit* or vegetable*                                                                                                                                                                        |
| S12  | public health or healthy living or health promotion                                                                                                                                         |
| S13  | (food* NEAR/3 (consumption OR consumed OR intake))                                                                                                                                          |
| S14  | (energy* NEAR/3 (consumption OR consumed OR intake))                                                                                                                                        |
| S15  | (beverage* NEAR/3 (consumption OR consumed OR intake))                                                                                                                                      |
| S16  | (drink*2 NEAR/3 (consumption OR consumed OR intake))                                                                                                                                        |
| S17  | S8 OR S10 OR S11 OR S12 OR S13 OR S14 OR S15 OR S16                                                                                                                                         |

|     |                                                                                                                                                                                                                                                                                                                                                                                                                                                                                                                                                                                                                                                                                                                                                                                                                                                                                                                                                                                                                                                                                                                                                                                                                                                                                                                                                                                                                                                                                                                                                                                                                                                                                                                                                                                                                                                                                                                                                                                    |
|-----|------------------------------------------------------------------------------------------------------------------------------------------------------------------------------------------------------------------------------------------------------------------------------------------------------------------------------------------------------------------------------------------------------------------------------------------------------------------------------------------------------------------------------------------------------------------------------------------------------------------------------------------------------------------------------------------------------------------------------------------------------------------------------------------------------------------------------------------------------------------------------------------------------------------------------------------------------------------------------------------------------------------------------------------------------------------------------------------------------------------------------------------------------------------------------------------------------------------------------------------------------------------------------------------------------------------------------------------------------------------------------------------------------------------------------------------------------------------------------------------------------------------------------------------------------------------------------------------------------------------------------------------------------------------------------------------------------------------------------------------------------------------------------------------------------------------------------------------------------------------------------------------------------------------------------------------------------------------------------------|
| S18 | S2 AND S7 AND S17                                                                                                                                                                                                                                                                                                                                                                                                                                                                                                                                                                                                                                                                                                                                                                                                                                                                                                                                                                                                                                                                                                                                                                                                                                                                                                                                                                                                                                                                                                                                                                                                                                                                                                                                                                                                                                                                                                                                                                  |
| S21 | ti(food* OR beverage* OR soda OR sodas OR soft drink* OR carbonated drink* OR sugar* OR fat OR fats OR sucrose OR candy OR sweet* OR snack* OR fastfood* OR junkfood* OR vending machine*)                                                                                                                                                                                                                                                                                                                                                                                                                                                                                                                                                                                                                                                                                                                                                                                                                                                                                                                                                                                                                                                                                                                                                                                                                                                                                                                                                                                                                                                                                                                                                                                                                                                                                                                                                                                         |
| S22 | ti(tax or taxes or taxation or taxing or price or prices or pricing or subsidy or subsidies or incentiv* or voucher* or reward*)                                                                                                                                                                                                                                                                                                                                                                                                                                                                                                                                                                                                                                                                                                                                                                                                                                                                                                                                                                                                                                                                                                                                                                                                                                                                                                                                                                                                                                                                                                                                                                                                                                                                                                                                                                                                                                                   |
| S23 | S21 AND S22                                                                                                                                                                                                                                                                                                                                                                                                                                                                                                                                                                                                                                                                                                                                                                                                                                                                                                                                                                                                                                                                                                                                                                                                                                                                                                                                                                                                                                                                                                                                                                                                                                                                                                                                                                                                                                                                                                                                                                        |
| S24 | S1 OR S18 OR S23                                                                                                                                                                                                                                                                                                                                                                                                                                                                                                                                                                                                                                                                                                                                                                                                                                                                                                                                                                                                                                                                                                                                                                                                                                                                                                                                                                                                                                                                                                                                                                                                                                                                                                                                                                                                                                                                                                                                                                   |
| S25 | (ti(Africa OR Caribbean OR West Indies OR South America OR Latin America OR Central America) OR ab(Africa OR Caribbean OR West Indies OR South America OR Latin America OR Central America) OR su(Africa OR Caribbean OR West Indies OR South America OR Latin America OR Central America)) OR ((developing NEAR/2 (countr* OR nation*2 OR population*2 OR world)) OR (less developed NEAR/2 (countr* OR nation*2 OR population*2 OR world)) OR (under developed NEAR/2 (countr* OR nation*2 OR population*2 OR world)) OR (underdeveloped NEAR/2 (countr* OR nation*2 OR population*2 OR world)) OR (middle income NEAR/2 (countr* OR nation*2 OR population*2 OR world)) OR (low income NEAR/2 (countr* OR nation*2 OR population*2 OR world)) OR (underserved NEAR/2 (countr* OR nation*2 OR population*2 OR world)) OR (under served NEAR/2 (countr* OR nation*2 OR population*2 OR world)) OR (deprived NEAR/2 (countr* OR nation*2 OR population*2 OR world)) OR (poor* NEAR/2 (countr* OR nation*2 OR population*2 OR world))) OR ((developing NEAR/2 (economy OR economies)) OR (less developed NEAR/2 (economy OR economies)) OR (under developed NEAR/2 (economy OR economies)) OR (underdeveloped NEAR/2 (economy OR economies)) OR (middle income NEAR/2 (economy OR economies)) OR (low income NEAR/2 (economy OR economies)) OR (underserved NEAR/2 (economy OR economies)) OR (under served NEAR/2 (economy OR economies)) OR (deprived NEAR/2 (economy OR economies)) OR (poor* NEAR/2 (economy OR economies))) OR (Imic OR Imics OR third world OR lami countr* OR transitional countr*) OR (Afghanistan OR Albania OR Algeria OR Angola OR Antigua OR Barbuda OR Argentina OR Armenia OR Armenian OR Aruba OR Azerbaijan OR Bahrain OR Bangladesh OR Barbados OR Benin OR Byelarus OR Byelorussian OR Belarus OR Belorussian OR Belorussia OR Belize OR Bhutan OR Bolivia OR Bosnia OR Herzegovina OR Hercegovina OR Botswana OR Brazil OR Brasil OR Bulgaria OR |

Burkina Faso OR Burkina Fasso OR Upper Volta OR Burundi OR Urundi OR Cambodia OR Khmer Republic OR Kampuchea OR Cameroon OR Cameroons OR Cameron OR Camerons OR Cape Verde OR Central African Republic OR Chad OR Chile OR China OR Colombia OR Comoros OR Comoro Islands OR Comores OR Mayotte OR Congo OR Zaire OR Costa Rica OR Cote d'Ivoire OR Ivory Coast OR Croatia OR Cuba OR Cyprus OR Czechoslovakia OR Czech Republic OR Slovakia OR Slovak Republic OR Djibouti OR French Somaliland OR Dominica OR Dominican Republic OR East Timor OR East Timur OR Timor Leste OR Ecuador OR Egypt OR United Arab Republic OR El Salvador OR Eritrea OR Estonia OR Ethiopia OR Fiji OR Gabon OR Gabonese Republic OR Gambia OR Gaza OR Georgia Republic OR Georgian Republic OR Ghana OR Gold Coast OR Greece OR Grenada OR Guatemala OR Guinea OR Guam OR Guiana OR Guyana OR Haiti OR Honduras OR Hungary OR India OR Maldives OR Indonesia OR Iran OR Iraq OR Isle of Man OR Jamaica OR Jordan OR Kazakhstan OR Kazakh OR Kenya OR Kiribati OR Korea OR Kosovo OR Kyrgyzstan OR Kirghizia OR Kyrgyz Republic OR Kirghiz OR Kirgizstan OR Lao PDR OR Laos OR Latvia OR Lebanon OR Lesotho OR Basutoland OR Liberia OR Libya OR Lithuania OR Macedonia OR Madagascar OR Malagasy Republic OR Malaysia OR Malaya OR Malay OR Sabah OR Sarawak OR Malawi OR Nyasaland OR Mali OR Malta OR Marshall Islands OR Mauritania OR Mauritius OR Agalega Islands OR Mexico OR Micronesia OR Middle East OR Moldova OR Moldovia OR Moldovian OR Mongolia OR Montenegro OR Morocco OR Ifni OR Mozambique OR Myanmar OR Myanma OR Burma OR Namibia OR Nepal OR Netherlands Antilles OR New Caledonia OR Nicaragua OR Niger OR Nigeria OR Northern Mariana Islands OR Oman OR Muscat OR Pakistan OR Palau OR Palestine OR Panama OR Paraguay OR Peru OR Philippines OR Philipines OR Phillipines OR Phillippines OR Poland OR Portugal OR Puerto Rico OR Romania OR Rumania OR Roumania OR Russia OR Russian OR Rwanda OR Ruanda OR Saint Kitts OR St Kitts OR Nevis OR Saint Lucia OR St Lucia OR Saint Vincent OR St Vincent OR Grenadines OR Samoa OR Samoan Islands OR Navigator Island OR Navigator Islands OR Sao Tome OR Saudi Arabia OR Senegal OR Serbia OR Montenegro OR Seychelles OR Sierra Leone OR Slovenia OR Sri Lanka OR Ceylon OR Solomon Islands OR Somalia OR Sudan OR Suriname OR Surinam OR Swaziland OR Syria OR Tajikistan OR Tadzhikistan OR Tadjikistan OR Tadzhiq OR Tanzania OR Thailand OR Togo OR Togolese Republic OR Tonga OR Trinidad OR Tobago OR Tunisia OR Turkey OR Turkmenistan OR Turkmen OR Uganda OR Ukraine OR Uruguay OR USSR OR Soviet Union OR Union of Soviet Socialist Republics OR Uzbekistan OR Uzbek OR Vanuatu OR New Hebrides OR Venezuela OR Vietnam OR Viet Nam OR West Bank OR

|     |                                                        |
|-----|--------------------------------------------------------|
|     | Yemen OR Yugoslavia OR Zambia OR Zimbabwe OR Rhodesia) |
| S26 | S24 AND S25                                            |

---

---

Proquest Dissertations & Theses:

**S7** S5 and S6

**S6** S1 or S4

**S5** (ti(Africa OR Caribbean OR West Indies OR South America OR Latin America OR Central America) OR ab(Africa OR Caribbean OR West Indies OR South America OR Latin America OR Central America) OR su(Africa OR Caribbean OR West Indies OR South America OR Latin America OR Central America)) OR ((developing NEAR/2 (countr\* OR nation\*2 OR population\*2 OR world)) OR (less developed NEAR/2 (countr\* OR nation\*2 OR population\*2 OR world)) OR (under developed NEAR/2 (countr\* OR nation\*2 OR population\*2 OR world)) OR (underdeveloped NEAR/2 (countr\* OR nation\*2 OR population\*2 OR world)) OR (middle income NEAR/2 (countr\* OR nation\*2 OR population\*2 OR world)) OR (low income NEAR/2 (countr\* OR nation\*2 OR population\*2 OR world)) OR (underserved NEAR/2 (countr\* OR nation\*2 OR population\*2 OR world)) OR (under served NEAR/2 (countr\* OR nation\*2 OR population\*2 OR world)) OR (deprived NEAR/2 (countr\* OR nation\*2 OR population\*2 OR world)) OR (poor\* NEAR/2 (countr\* OR nation\*2 OR population\*2 OR world))) OR ((developing NEAR/2 (economy OR economies)) OR (less developed NEAR/2 (economy OR economies)) OR (under developed NEAR/2 (economy OR economies)) OR (underdeveloped NEAR/2 (economy OR economies)) OR (middle income NEAR/2 (economy OR economies)) OR (low income NEAR/2 (economy OR economies)) OR (underserved NEAR/2 (economy OR economies)) OR (under served NEAR/2 (economy OR economies)) OR (deprived NEAR/2 (economy OR economies)) OR (poor\* NEAR/2 (economy OR economies))) OR (lmic OR lmic OR third world OR lami countr\* OR transitional countr\*) OR (Afghanistan OR Albania OR Algeria OR Angola OR Antigua OR Barbuda OR Argentina OR Armenia OR Armenian OR Aruba OR Azerbaijan OR Bahrain OR Bangladesh OR Barbados OR Benin OR Byelarus OR Byelorussian OR Belarus OR Belorussian OR Belorussia OR Belize OR Bhutan OR Bolivia OR Bosnia OR Herzegovina OR Hercegovina OR Botswana OR Brazil OR Brasil OR Bulgaria OR Burkina Faso OR Burkina Fasso OR Upper Volta OR Burundi OR Urundi OR Cambodia OR Khmer Republic OR Kampuchea OR Cameroon OR Cameroons OR Cameron OR Camerons OR Cape Verde OR Central African Republic OR Chad OR Chile OR China OR Colombia OR Comoros OR Comoro Islands OR Comores OR Mayotte OR Congo OR Zaire OR Costa Rica OR Cote d'Ivoire OR Ivory Coast OR Croatia OR Cuba OR Cyprus OR Czechoslovakia OR Czech Republic OR Slovakia OR Slovak Republic OR Djibouti OR French Somaliland OR Dominica OR Dominican Republic OR East Timor OR East Timur OR Timor Leste OR Ecuador OR Egypt OR United Arab Republic OR El Salvador OR Eritrea OR Estonia OR Ethiopia OR Fiji OR Gabon OR Gabonese Republic OR Gambia OR Gaza OR Georgia Republic OR Georgian Republic OR Ghana OR Gold Coast OR Greece OR Grenada OR Guatemala OR Guinea OR Guam OR Guiana OR Guyana OR Haiti OR Honduras OR Hungary OR India OR Maldives OR Indonesia OR Iran OR Iraq OR Isle of Man OR Jamaica OR Jordan OR Kazakhstan OR Kazakh OR Kenya OR Kiribati OR Korea OR Kosovo OR Kyrgyzstan OR Kirghizia OR Kyrgyz Republic OR Kirghiz OR Kirgizstan OR Lao PDR OR Laos OR Latvia OR Lebanon OR Lesotho OR Basutoland

OR Liberia OR Libya OR Lithuania OR Macedonia OR Madagascar OR Malagasy Republic OR Malaysia OR Malaya OR Malay OR Sabah OR Sarawak OR Malawi OR Nyasaland OR Mali OR Malta OR Marshall Islands OR Mauritania OR Mauritius OR Agalega Islands OR Mexico OR Micronesia OR Middle East OR Moldova OR Moldavia OR Moldovan OR Mongolia OR Montenegro OR Morocco OR Ifni OR Mozambique OR Myanmar OR Myanma OR Burma OR Namibia OR Nepal OR Netherlands Antilles OR New Caledonia OR Nicaragua OR Niger OR Nigeria OR Northern Mariana Islands OR Oman OR Muscat OR Pakistan OR Palau OR Palestine OR Panama OR Paraguay OR Peru OR Philippines OR Philipines OR Phillipines OR Phillippines OR Poland OR Portugal OR Puerto Rico OR Romania OR Rumania OR Roumania OR Russia OR Russian OR Rwanda OR Ruanda OR Saint Kitts OR St Kitts OR Nevis OR Saint Lucia OR St Lucia OR Saint Vincent OR St Vincent OR Grenadines OR Samoa OR Samoan Islands OR Navigator Island OR Navigator Islands OR Sao Tome OR Saudi Arabia OR Senegal OR Serbia OR Montenegro OR Seychelles OR Sierra Leone OR Slovenia OR Sri Lanka OR Ceylon OR Solomon Islands OR Somalia OR Sudan OR Suriname OR Surinam OR Swaziland OR Syria OR Tajikistan OR Tadzhiistan OR TNEAR/2ikistan OR Tadzhi OR Tanzania OR Thailand OR Togo OR Togolese Republic OR Tonga OR Trinidad OR Tobago OR Tunisia OR Turkey OR Turkmenistan OR Turkmen OR Uganda OR Ukraine OR Uruguay OR USSR OR Soviet Union OR Union of Soviet Socialist Republics OR Uzbekistan OR Uzbek OR Vanuatu OR New Hebrides OR Venezuela OR Vietnam OR Viet Nam OR West Bank OR Yemen OR Yugoslavia OR Zambia OR Zimbabwe OR Rhodesia)

**S4** 2 and 3

**S3** ti(tax or taxes or taxation or taxing or price or prices or pricing or subsidy or subsidies or incentiv\* or voucher\* or reward\*)

**S2** ti(food\* OR beverage\* OR soda OR sodas OR soft drink\* OR carbonated drink\* OR sugar\* OR fat OR fats OR sucrose OR candy OR sweet\* OR snack\* OR fastfood\* OR junkfood\* OR vending machine\*)

**S1** ti(obes\* OR overweight OR fat) AND ti(tax\*)

Science Citation Index, Social Science Citation Index, Conference Proceedings Citation Index – Science & Conference Proceedings Citation Index – Social Science & Humanities. (Web of Science, 1945-present)

# 20 #10 NOT #11

# 19 #11 NOT #18

# 18 #17 AND #11

# 17 #16 OR #15 OR #14 OR #13 OR #12

# 16 TS=(Afghanistan OR Albania OR Algeria OR Angola OR Antigua OR Barbuda OR Argentina OR Armenia OR Armenian OR Aruba OR Azerbaijan OR Bahrain OR Bangladesh OR Barbados OR Benin OR Byelarus OR Byelorussian OR Belarus OR Belorussian OR Belorussia OR Belize OR Bhutan OR Bolivia OR Bosnia OR Herzegovina OR Hercegovina OR Botswana OR Brazil OR Brasil OR Bulgaria OR Burkina Faso OR Burkina Fasso OR Upper Volta OR Burundi OR Urundi OR Cambodia OR Khmer Republic OR Kampuchea OR Cameroon OR Cameroons OR Cameron OR Camerons OR Cape Verde OR Central African Republic OR Chad OR Chile OR China OR Colombia OR Comoros OR Comoro Islands OR Comores OR Mayotte OR Congo OR Zaire OR Costa Rica OR Cote d'Ivoire OR Ivory Coast OR Croatia OR Cuba OR Cyprus OR Czechoslovakia OR Czech Republic OR Slovakia OR Slovak Republic OR Djibouti OR French Somaliland OR Dominica OR Dominican Republic OR East Timor OR East Timur OR Timor Leste OR Ecuador OR Egypt OR United Arab Republic OR El Salvador OR Eritrea OR Estonia OR Ethiopia OR Fiji OR Gabon OR Gabonese Republic OR Gambia OR Gaza OR Georgia Republic OR Georgian Republic OR Ghana OR Gold Coast OR Greece OR Grenada OR Guatemala OR Guinea OR Guam OR Guiana OR Guyana OR Haiti OR Honduras OR Hungary OR India OR Maldives OR Indonesia OR Iran OR Iraq OR Isle of Man OR Jamaica OR Jordan OR Kazakhstan OR Kazakh OR Kenya OR Kiribati OR Korea OR Kosovo OR Kyrgyzstan OR Kirghizia OR Kyrgyz Republic OR Kirghiz OR Kirgizstan OR Lao PDR OR Laos OR Latvia OR Lebanon OR Lesotho OR Basutoland OR Liberia OR Libya OR Lithuania OR Macedonia OR Madagascar OR Malagasy Republic OR Malaysia OR Malaya OR Malay OR Sabah OR Sarawak OR Malawi OR Nyasaland OR Mali OR Malta OR Marshall Islands OR Mauritania OR Mauritius OR Agalega Islands OR Mexico OR Micronesia OR Middle East OR Moldova OR Moldovia OR Moldovian OR Mongolia OR Montenegro OR Morocco OR Ifni OR Mozambique OR Myanmar OR Myanma OR Burma OR Namibia OR Nepal OR Netherlands Antilles OR New Caledonia OR Nicaragua OR Niger OR Nigeria OR Northern Mariana Islands OR Oman OR Muscat OR Pakistan OR Palau OR Palestine OR Panama OR Paraguay OR Peru OR Philippines OR Philipines OR Phillipines OR Phillippines OR Poland OR Portugal OR Puerto Rico OR Romania OR Rumania OR Roumania OR Russia OR Russian OR Rwanda OR Ruanda OR Saint Kitts OR St Kitts OR Nevis OR Saint Lucia OR St Lucia OR Saint Vincent OR St Vincent OR Grenadines OR Samoa OR Samoan Islands OR Navigator Island OR Navigator Islands OR Sao Tome OR Saudi Arabia OR Senegal OR Serbia OR Montenegro OR Seychelles OR Sierra Leone OR Slovenia OR Sri Lanka OR Ceylon OR Solomon Islands OR Somalia OR Sudan OR Suriname OR Surinam OR Swaziland OR Syria OR Tajikistan OR Tadzhikistan OR TNEAR/2ikistan OR Tadzhik OR Tanzania OR Thailand OR Togo OR Togolese Republic OR Tonga OR Trinidad OR Tobago OR Tunisia OR Turkey OR



Turkmenistan OR Turkmen OR Uganda OR Ukraine OR Uruguay OR USSR OR Soviet Union OR Union of Soviet Socialist Republics OR Uzbekistan OR Uzbek OR Vanuatu OR New Hebrides OR Venezuela OR Vietnam OR Viet Nam OR West Bank OR Yemen OR Yugoslavia OR Zambia OR Zimbabwe OR Rhodesia) OR AD=(Afghanistan OR Albania OR Algeria OR Angola OR Antigua OR Barbuda OR Argentina OR Armenia OR Armenian OR Aruba OR Azerbaijan OR Bahrain OR Bangladesh OR Barbados OR Benin OR Byelarus OR Byelorussian OR Belarus OR Belorussian OR Belorussia OR Belize OR Bhutan OR Bolivia OR Bosnia OR Herzegovina OR Hercegovina OR Botswana OR Brazil OR Brasil OR Bulgaria OR Burkina Faso OR Burkina Fasso OR Upper Volta OR Burundi OR Urundi OR Cambodia OR Khmer Republic OR Kampuchea OR Cameroon OR Cameroons OR Cameron OR Camerons OR Cape Verde OR Central African Republic OR Chad OR Chile OR China OR Colombia OR Comoros OR Comoro Islands OR Comores OR Mayotte OR Congo OR Zaire OR Costa Rica OR Cote d'Ivoire OR Ivory Coast OR Croatia OR Cuba OR Cyprus OR Czechoslovakia OR Czech Republic OR Slovakia OR Slovak Republic OR Djibouti OR French Somaliland OR Dominica OR Dominican Republic OR East Timor OR East Timor OR Timor Leste OR Ecuador OR Egypt OR United Arab Republic OR El Salvador OR Eritrea OR Estonia OR Ethiopia OR Fiji OR Gabon OR Gabonese Republic OR Gambia OR Gaza OR Georgia Republic OR Georgian Republic OR Ghana OR Gold Coast OR Greece OR Grenada OR Guatemala OR Guinea OR Guam OR Guiana OR Guyana OR Haiti OR Honduras OR Hungary OR India OR Maldives OR Indonesia OR Iran OR Iraq OR Isle of Man OR Jamaica OR Jordan OR Kazakhstan OR Kazakh OR Kenya OR Kiribati OR Korea OR Kosovo OR Kyrgyzstan OR Kirghizia OR Kyrgyz Republic OR Kirghiz OR Kirgizstan OR Lao PDR OR Laos OR Latvia OR Lebanon OR Lesotho OR Basutoland OR Liberia OR Libya OR Lithuania OR Macedonia OR Madagascar OR Malagasy Republic OR Malaysia OR Malaya OR Malay OR Sabah OR Sarawak OR Malawi OR Nyasaland OR Mali OR Malta OR Marshall Islands OR Mauritania OR Mauritius OR Agalega Islands OR Mexico OR Micronesia OR Middle East OR Moldova OR Moldovia OR Moldovian OR Mongolia OR Montenegro OR Morocco OR Ifni OR Mozambique OR Myanmar OR Myanma OR Burma OR Namibia OR Nepal OR Netherlands Antilles OR New Caledonia OR Nicaragua OR Niger OR Nigeria OR Northern Mariana Islands OR Oman OR Muscat OR Pakistan OR Palau OR Palestine OR Panama OR Paraguay OR Peru OR Philippines OR Philipines OR Phillipines OR Phillippines OR Poland OR Portugal OR Puerto Rico OR Romania OR Rumania OR Roumania OR Russia OR Russian OR Rwanda OR Ruanda OR Saint Kitts OR St Kitts OR Nevis OR Saint Lucia OR St Lucia OR Saint Vincent OR St Vincent OR Grenadines OR Samoa OR Samoan Islands OR Navigator Island OR Navigator Islands OR Sao Tome OR Saudi Arabia OR Senegal OR Serbia OR Montenegro OR Seychelles OR Sierra Leone OR Slovenia OR Sri Lanka OR Ceylon OR Solomon Islands OR Somalia OR Sudan OR Suriname OR Surinam OR Swaziland OR Syria OR Tajikistan OR Tadzhikistan OR TNEAR/2ikistan OR Tadzhik OR Tanzania OR Thailand OR Togo OR Togolese Republic OR Tonga OR Trinidad OR Tobago OR Tunisia OR Turkey OR Turkmenistan OR Turkmen OR Uganda OR Ukraine OR Uruguay OR USSR OR Soviet Union OR Union of Soviet Socialist Republics OR Uzbekistan OR Uzbek OR Vanuatu OR New Hebrides OR Venezuela OR Vietnam OR Viet Nam OR West Bank OR Yemen OR Yugoslavia OR Zambia OR Zimbabwe OR Rhodesia)

# 15 TS=(Imic OR Imics OR "third world" OR "lami countr\*" OR "transitional countr\*")

# 14 TS=((developing NEAR/2 (economy OR economies))) OR TS=(("less developed" NEAR/2 (economy OR economies))) OR TS=(("under developed" NEAR/2 (economy OR economies))) OR

TS=((underdeveloped NEAR/2 (economy OR economies))) OR TS=(("middle income" NEAR/2 (economy OR economies))) OR TS=(("low income" NEAR/2 (economy OR economies))) OR TS=((underserved NEAR/2 (economy OR economies))) OR TS=(("under served" NEAR/2 (economy OR economies))) OR TS=((deprived NEAR/2 (economy OR economies))) OR TS=((poor\* NEAR/2 (economy OR economies)))

# 13 TS=((developing NEAR/2 (countr\* OR nation\*2 OR population\*2 OR world))) OR TS=(("less developed" NEAR/2 (countr\* OR nation\*2 OR population\*2 OR world))) OR TS=(("under developed" NEAR/2 (countr\* OR nation\*2 OR population\*2 OR world))) OR TS=((underdeveloped NEAR/2 (countr\* OR nation\*2 OR population\*2 OR world))) OR TS=(("middle income" NEAR/2 (countr\* OR nation\*2 OR population\*2 OR world))) OR TS=(("low income" NEAR/2 (countr\* OR nation\*2 OR population\*2 OR world))) OR TS=((underserved NEAR/2 (countr\* OR nation\*2 OR population\*2 OR world))) OR TS=(("under served" NEAR/2 (countr\* OR nation\*2 OR population\*2 OR world))) OR TS=((deprived NEAR/2 (countr\* OR nation\*2 OR population\*2 OR world))) OR TS=((poor\* NEAR/2 (countr\* OR nation\*2 OR population\*2 OR world)))

# 12 TS=(Africa OR Caribbean OR "West Indies" OR "South America" OR "Latin America" OR "Central America") OR AD=(Africa OR Caribbean OR "West Indies" OR "South America" OR "Latin America" OR "Central America")

# 11 #9 OR #5 OR #4 OR #3 OR #2 OR #1 Refined by: Languages=( ENGLISH )

# 10 #9 OR #5 OR #4 OR #3 OR #2 OR #1

# 9 #8 AND #7 AND #6

# 8 TS=("body mass" OR bmi OR "body weight" OR obes\* OR overweight OR "public health" OR "healthy living" OR "health promotion") OR TS=("public health" or "healthy living" or "health promotion") OR TS=(fruit\* or vegetable\*) OR TS=((health\* NEAR/3 (food\* or eating or choice\* or lifestyle or lifestyle))) OR TS=((food\* NEAR/3 (consumption OR consumed OR intake))) OR TS=((energy\* NEAR/3 (consumption OR consumed OR intake))) OR TS=((beverage\* NEAR/3 (consumption OR consumed OR intake))) OR TS=((drink\*2 NEAR/3 (consumption OR consumed OR intake)))

# 7 TS=((elastic\* NEAR/3 (price\* or pricing or demand\* or fiscal\* or economic\* or financ\* or cost\*))) OR TS=((policy NEAR/3 (price\* or pricing or demand\* or fiscal\* or economic\* or financ\* or cost\*))) OR TS=((policies NEAR/3 (price\* or pricing or demand\* or fiscal\* or economic\* or financ\* or cost\*))) OR TS=(tax or taxes or taxation or taxing or subsidy or subsidies or incentiv\* or voucher\*)

# 6 TS=(food\* or beverage\* or soda or sodas or soft drink\* or carbonated drink\* or sugar\* or fat or fats or sucrose or candy or sweet\* or snack\* or fastfood\* or junkfood\* or vending machine\*)

# 5 TI=((obes\* OR overweight OR fat)) AND TI=(tax OR taxes OR taxation OR taxing)

# 4 TI=(tax or taxes or taxation or taxing or price or prices or pricing or subsidy or subsidies or incentiv\* or voucher\*) AND TI=(food\* OR beverage\* OR soda OR sodas OR "soft drink\*" OR "carbonated drink\*" OR sugar\* OR fat OR fats OR sucrose OR candy OR sweet\* OR snack\* OR

fastfood\* OR junkfood\* OR "vending machine\*") AND TS=(fruit\* OR vegetable)

- # 3 TI=(tax or taxes or taxation or taxing or price or prices or pricing or subsidy or subsidies or incentiv\* or voucher\*) AND TI=(food\* OR beverage\* OR soda OR sodas OR "soft drink\*" OR "carbonated drink\*" OR sugar\* OR fat OR fats OR sucrose OR candy OR sweet\* OR snack\* OR fastfood\* OR junkfood\* OR "vending machine\*") AND TS=((health\* NEAR/3 (food\* or eating or choice\* or lifestyle or lifestyle)))
- # 2 TI=(tax or taxes or taxation or taxing or price or prices or pricing or subsidy or subsidies or incentiv\* or voucher\*) AND TI=(food\* OR beverage\* OR soda OR sodas OR "soft drink\*" OR "carbonated drink\*" OR sugar\* OR fat OR fats OR sucrose OR candy OR sweet\* OR snack\* OR fastfood\* OR junkfood\* OR "vending machine\*") AND TS=("body mass" OR bmi OR "body weight" OR obes\* OR overweight OR "public health" OR "healthy living" OR "health promotion")
- # 1 TI=(tax or taxes or taxation or taxing or subsidy or subsidies or incentiv\* or voucher\*) AND TI=(food\* OR beverage\* OR soda OR sodas OR "soft drink\*" OR "carbonated drink\*" OR sugar\* OR fat OR fats OR sucrose OR candy OR sweet\* OR snack\* OR fastfood\* OR junkfood\* OR "vending machine\*")
-

---

**Grey literature:**

**OECDiLibrary** <http://www.oecd-ilibrary.org/> - 20 results

(food\* OR beverage\* OR soda OR sodas OR soft drink\* OR carbonated drink\* OR sugar\* OR fat OR fats OR sucrose OR candy OR sweet\* OR snack\* OR fastfood\* OR junkfood\* OR vending machine\*) AND (tax OR taxes OR taxation OR taxing OR subsidy OR subsidies OR incentiv\* OR voucher\*) – in Title and abstract

(obese OR obesity OR overweight OR fat OR "healthy eating" OR "healthy lifestyle") AND (tax OR taxes OR taxation OR taxing OR subsidy OR subsidies OR incentiv\* OR voucher\*) – in Title

(food\* OR beverage\* OR soda OR sodas OR soft drink\* OR carbonated drink\* OR sugar\* OR fat OR fats OR sucrose OR candy OR sweet\* OR snack\* OR fastfood\* OR junkfood\* OR vending machine\*) AND ("price elasticity" OR "price elasticities" OR "deman elasticity" OR "demand elasticities" OR "financial elasticity" OR "financial elasticities" OR "pricing elasticity" OR "pricing elasticities" OR "economic elasticity" OR "economic elasticities" OR "cost elasticity" OR "cost elasticities" OR "fiscal elasticity" OR "fiscal elasticities") – in Title and abstract

**ClinicalTrials.gov** <http://clinicaltrials.gov> – 10 results

Condition=food\* OR beverage\* OR soda OR sodas OR soft drink\* OR carbonated drink\* OR sugar\* OR fat OR fats OR sucrose OR candy OR sweet\* OR snack\* OR fastfood\* OR junkfood\* OR vending machine\* AND Intervention= tax OR taxes OR taxation OR taxing OR subsidy OR subsidies OR incentiv\* OR voucher\*

Title=food\* OR beverage\* OR soda OR sodas OR soft drink\* OR carbonated drink\* OR sugar\* OR fat OR fats OR sucrose OR candy OR sweet\* OR snack\* OR fastfood\* OR junkfood\* OR vending machine\* AND Intervention= tax OR taxes OR taxation OR taxing OR subsidy OR subsidies OR incentiv\* OR voucher\*

Condition=overweight OR obese OR obesity AND intervention= tax OR taxes OR taxation OR taxing OR subsidy OR subsidies OR incentiv\* OR voucher\*

Condition=overweight OR obese OR obesity AND title= tax OR taxes OR taxation OR taxing OR subsidy OR subsidies OR incentiv\* OR voucher\*

Title=overweight OR obese OR obesity AND intervention= tax OR taxes OR taxation OR taxing OR subsidy OR subsidies OR incentiv\* OR voucher\*

**OPENGrey** <http://www.opengrey.eu/> - 0 results

---

"fat tax", "fat taxes" , "soda tax" , "soda taxes" , "soft drinks tax" , "soft drinks taxes" , "sugar tax" , "sugar taxes" , "fastfood tax" , "fastfood taxes" , "fast food tax" , "fast food taxes" , "junkfood tax" , "junk food tax" , "junkfood taxes" , "junk food taxes" , "food subsidy" , "food subsidies" , food incentive, food incentives

---

**Web searches on Google:** done by running the following searches and then browsed the 1<sup>st</sup> 2-3 pages of results to see if there is anything relevant.

**General web searches:**

("fat tax" OR "fat taxes" OR "soda tax" OR "soda taxes" OR "soft drinks tax" OR "soft drinks taxes" OR "sugar tax" OR "sugar taxes" OR "fastfood tax" OR "fastfood taxes" OR "fast food tax" OR "fast food taxes" OR "junkfood tax" OR "junk food tax" OR "junkfood taxes" OR "junk food taxes")

("food tax" OR "food taxes" OR "food taxation") AND (obese OR obesity OR overweight)

("fiscal policy" OR "fiscal policies" OR "financial policy" OR "financial policies" OR "economic policy" OR "economic policies") AND (obese OR obesity OR overweight)

**Using Google to search specific web-sites:** OECD, World Bank, WHO, .org sites & .org.uk sites. You may be able to think of other organisations.

("fat tax" OR "fat taxes" OR "soda tax" OR "soda taxes" OR "soft drinks tax" OR "soft drinks taxes" OR "sugar tax" OR "sugar taxes" OR "fastfood tax" OR "fastfood taxes" OR "fast food tax" OR "fast food taxes" OR "junkfood tax" OR "junk food tax" OR "junkfood taxes" OR "junk food taxes") site:who.int

("food tax" OR "food taxes" OR "food taxation") AND (obese OR obesity OR overweight) site:who.int

("fiscal policy" OR "fiscal policies" OR "financial policy" OR "financial policies" OR "economic policy" OR "economic policies") AND (obese OR obesity OR overweight) site:who.int

("fat tax" OR "fat taxes" OR "soda tax" OR "soda taxes" OR "soft drinks tax" OR "soft drinks taxes" OR "sugar tax" OR "sugar taxes" OR "fastfood tax" OR "fastfood taxes" OR "fast food tax" OR "fast food taxes" OR "junkfood tax" OR "junk food tax" OR "junkfood taxes" OR "junk food taxes") site:oecd.org

("food tax" OR "food taxes" OR "food taxation") AND (obese OR obesity OR overweight) site:oecd.org

("fiscal policy" OR "fiscal policies" OR "financial policy" OR "financial policies" OR "economic policy" OR "economic policies") AND (obese OR obesity OR overweight) site:oecd.org

("fat tax" OR "fat taxes" OR "soda tax" OR "soda taxes" OR "soft drinks tax" OR "soft drinks taxes" OR "sugar tax" OR "sugar taxes" OR "fastfood tax" OR "fastfood taxes" OR "fast food tax" OR "fast food taxes" OR "junkfood tax" OR "junk food tax" OR "junkfood taxes" OR "junk food taxes") site:worldbank.org

("food tax" OR "food taxes" OR "food taxation") AND (obese OR obesity OR overweight) site:worldbank.org

("fiscal policy" OR "fiscal policies" OR "financial policy" OR "financial policies" OR "economic policy" OR "economic policies") AND (obese OR obesity OR overweight) site:worldbank.org

("fat tax" OR "fat taxes" OR "soda tax" OR "soda taxes" OR "soft drinks tax" OR "soft drinks taxes" OR "sugar tax" OR "sugar taxes" OR "fastfood tax" OR "fastfood taxes" OR "fast food tax" OR "fast food taxes" OR "junkfood tax" OR "junk food tax" OR "junkfood taxes" OR "junk food taxes") site:.org

("food tax" OR "food taxes" OR "food taxation") AND (obese OR obesity OR overweight) site:.org

("fiscal policy" OR "fiscal policies" OR "financial policy" OR "financial policies" OR "economic policy" OR "economic policies) AND (obese OR obesity OR overweight) site:.org

("fat tax" OR "fat taxes" OR "soda tax" OR "soda taxes" OR "soft drinks tax" OR "soft drinks taxes" OR "sugar tax" OR "sugar taxes" OR "fastfood tax" OR "fastfood taxes" OR "fast food tax" OR "fast food taxes" OR "junkfood tax" OR "junk food tax" OR "junkfood taxes" OR "junk food taxes") site:org.uk

("food tax" OR "food taxes" OR "food taxation") AND (obese OR obesity OR overweight) site:org.uk

("fiscal policy" OR "fiscal policies" OR "financial policy" OR "financial policies" OR "economic policy" OR "economic policies) AND (obese OR obesity OR overweight) site:org.uk
